# Supplementary material
Source: publisher figshare collection journal article supplement (https://gsajournals.figshare.com/ndownloader/files/13539131)
Supplement: Supplementary file 1 [file 13539131]

## List of Supplemental Files

File S1. *supplemental\_file\_list.pdf* – List of supplemental files

File S2. *supplemental\_materials.pdf* – Figures S1-S11; Tables S1, S2; supplemental references

File S3. *at\_risk\_id\_key.tsv* – Contains individual IDs and phenotypes for at-risk dogs.

File S4. *breed\_id\_key.tsv* – Contains individual IDs, breed, and sex information for breed dogs.

File S5. *at\_risk.ped.gz\** – Gzipped genotype data for at-risk dog analysis.

File S6. *at\_risk.map* – Marker locations for at-risk dog analysis.

File S7. *breeds.ped.gz\** – Gzipped genotype data for breed dog analysis.

File S8. *breeds.map* – Marker locations for breed dog analysis.

File S9. *postprocess\_germline.py* – Python script for post-processing germline outputs as described in manuscript

\* in the included genotype datasets, the pseudo-autosomal region of chromosome X has been combined with the X chromosome and re-labeled such that both are included as chr41.
